# Supplementary material for: Synthesis and characterisation of π-conjugated polymer/silica hybrids containing regioregular ionic polythiophenes
Source: Royal Society of Chemistry journal article supplement (doi:10.1039/c0jm03598j), 2011-01-01
Supplement: c0jm03598j.pdf [file c0jm03598j.pdf]

## Supporting Information

### Synthesis and Characterisation of $\pi$ -Conjugated Polymer / Silica Hybrids Containing Regioregular Ionic Polythiophenes

Sébastien Clément, Akim Tizit, Simon Desbief, Ahmad Mehdi, Julien De Winter, Pascal Gerbaux, Roberto Lazzaroni and Bruno Boury

| Contents                                                                                                                                  | Page |
|-------------------------------------------------------------------------------------------------------------------------------------------|------|
| <b>Figure S1:</b> $^1\text{H}$ NMR spectrum of polymer <b>7</b> in $\text{CDCl}_3$                                                        | S2   |
| <b>Figure S2:</b> $^1\text{H}$ NMR spectrum of polymer <b>8</b> in $\text{CDCl}_3$                                                        | S3   |
| <b>Figure S3:</b> $^1\text{H}$ NMR spectrum of polymer <b>9</b> in $\text{CDCl}_3$                                                        | S4   |
| <b>Figure S4:</b> MALDI-TOF spectrum for polymer <b>8</b> .                                                                               | S5   |
| <b>Figure S5:</b> MALDI-TOF spectrum for polymer <b>9</b> .                                                                               | S6   |
| <b>Figure S6:</b> UV-Vis spectra of polymers <b>7-9</b> in $\text{CHCl}_3$ .                                                              | S7   |
| <b>Figure S7:</b> TGA diagrams for polymers <b>7-9</b> .                                                                                  | S7   |
| <b>Figure S8:</b> $^1\text{H}$ NMR spectrum of polymer <b>11</b> in $\text{CD}_3\text{OD}$                                                | S8   |
| <b>Figure S9:</b> $^{13}\text{C}\{^1\text{H}\}$ NMR spectrum of polymer <b>11</b> in $\text{CD}_3\text{OD}$                               | S9   |
| <b>Figure S10:</b> SEM images of polymer <b>10</b> \ silica ( <i>up</i> ) and polymer <b>12</b> \ silica ( <i>down</i> ) hybrid materials | S10  |
| <b>Figure S11:</b> TGA curve of the cationic polymer <b>11</b> .                                                                          | S11  |
| <b>Figure S12.</b> TGA curve of the polymer hybrid ( <b>run 2</b> )                                                                       | S11  |

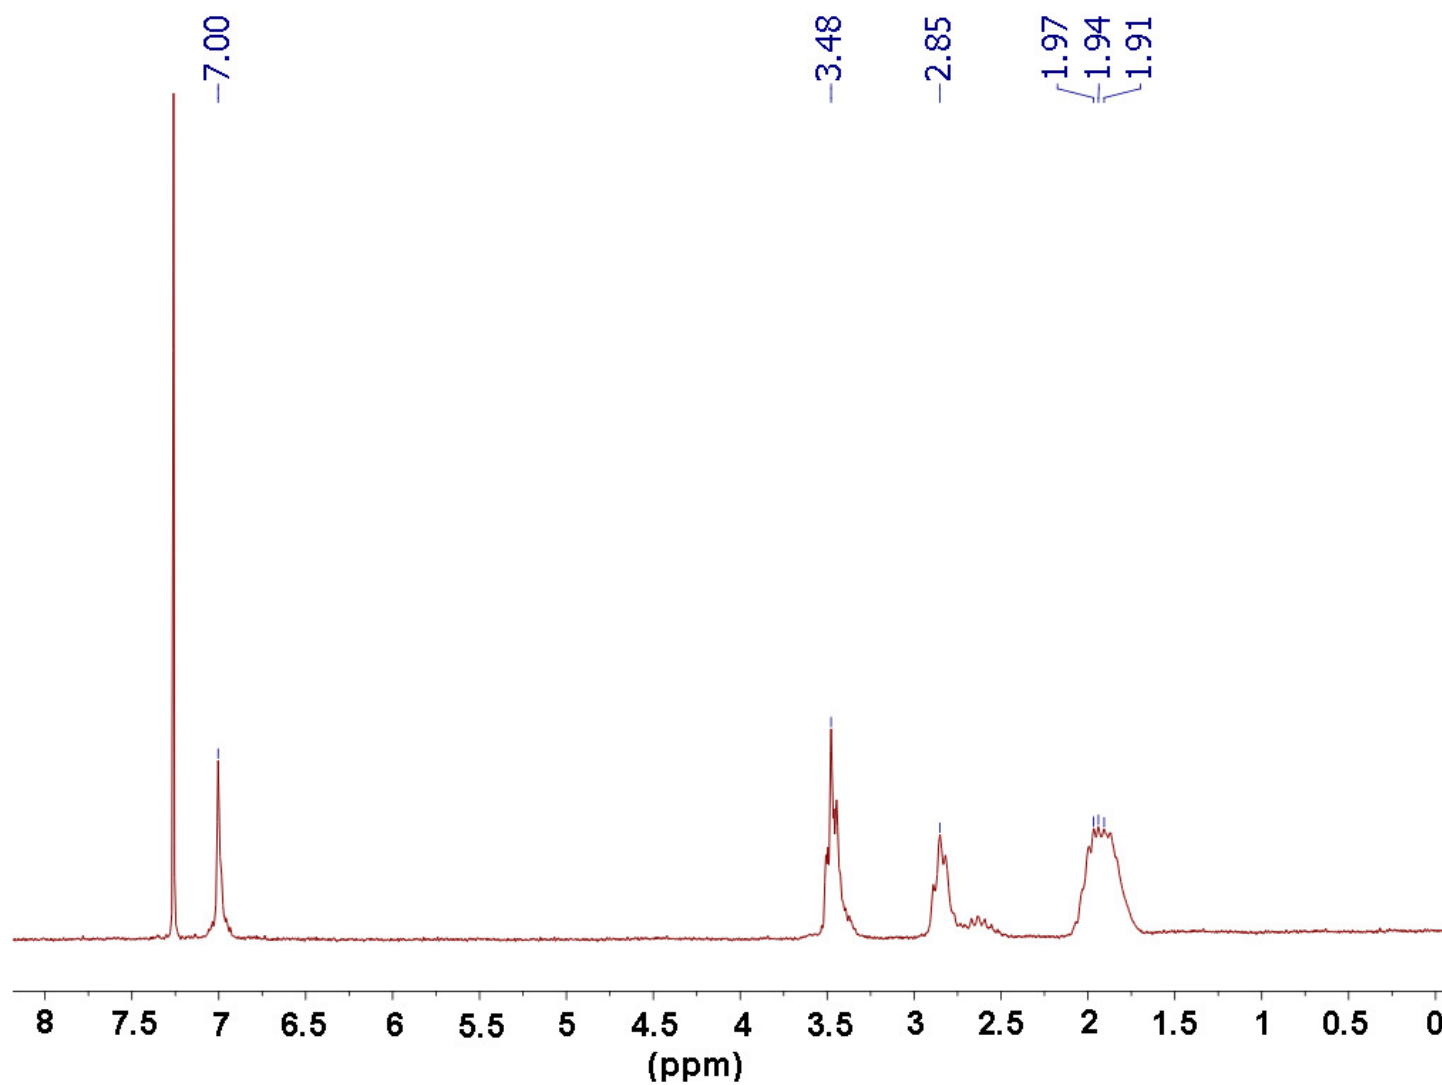

Figure S1 :  $^1\text{H}$  NMR spectrum of polymer 7 in  $\text{CDCl}_3$ .

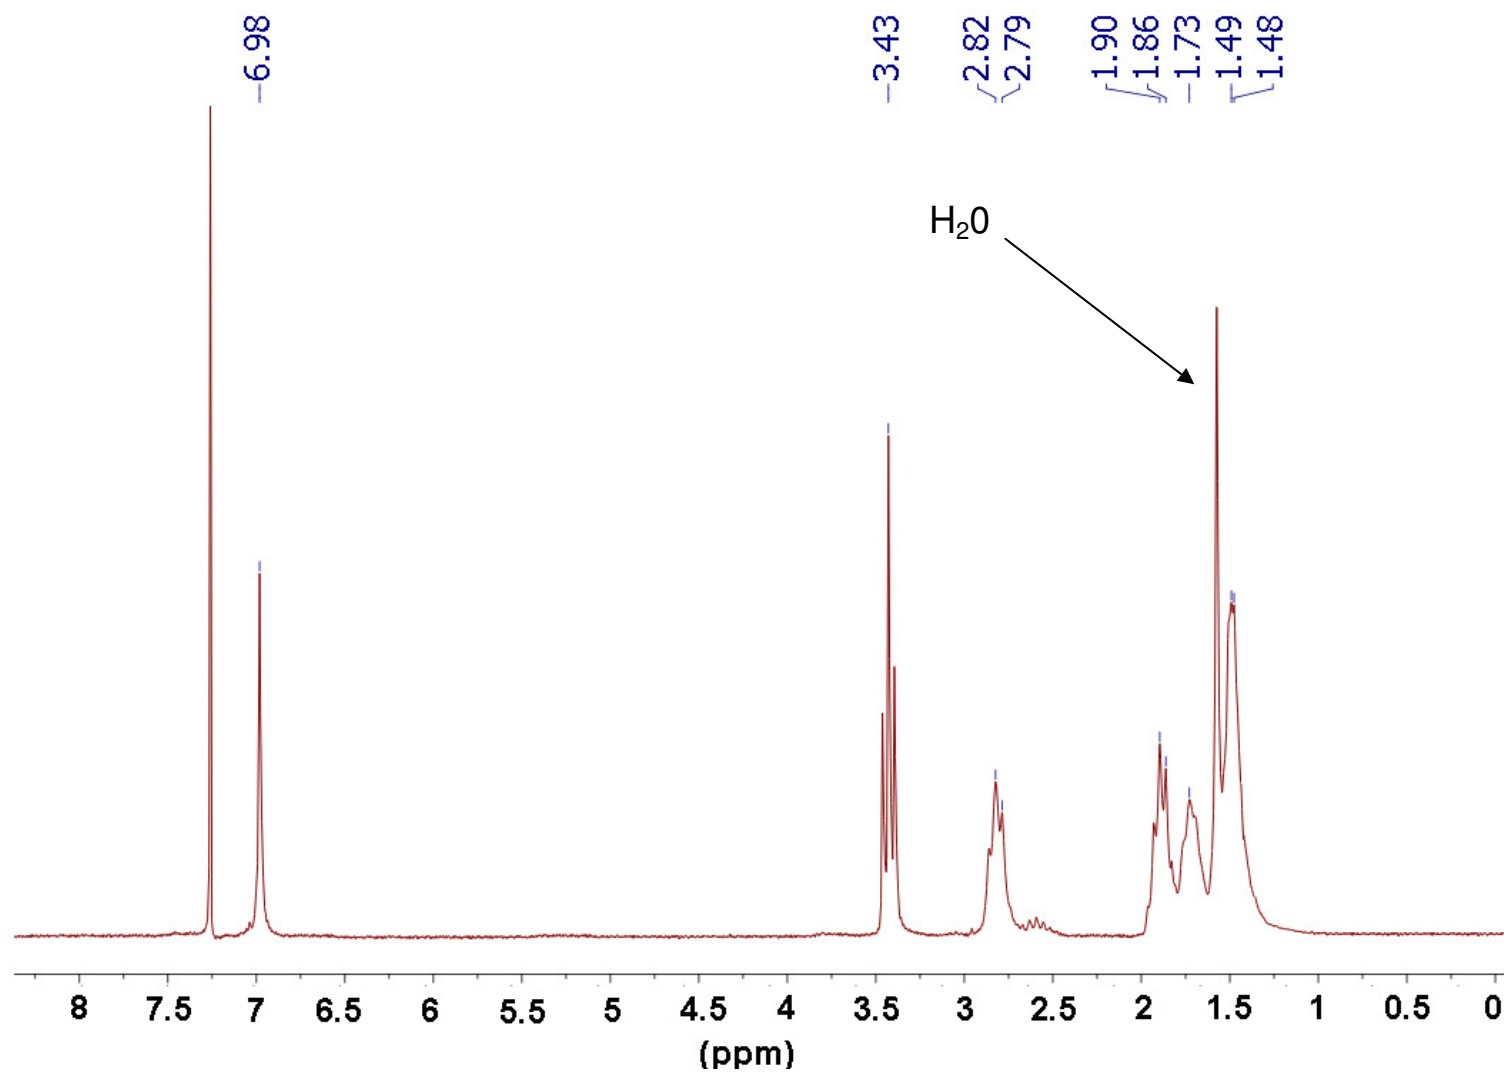

Figure S2 :  $^1\text{H}$  NMR spectrum of polymer **8** in  $\text{CDCl}_3$ .

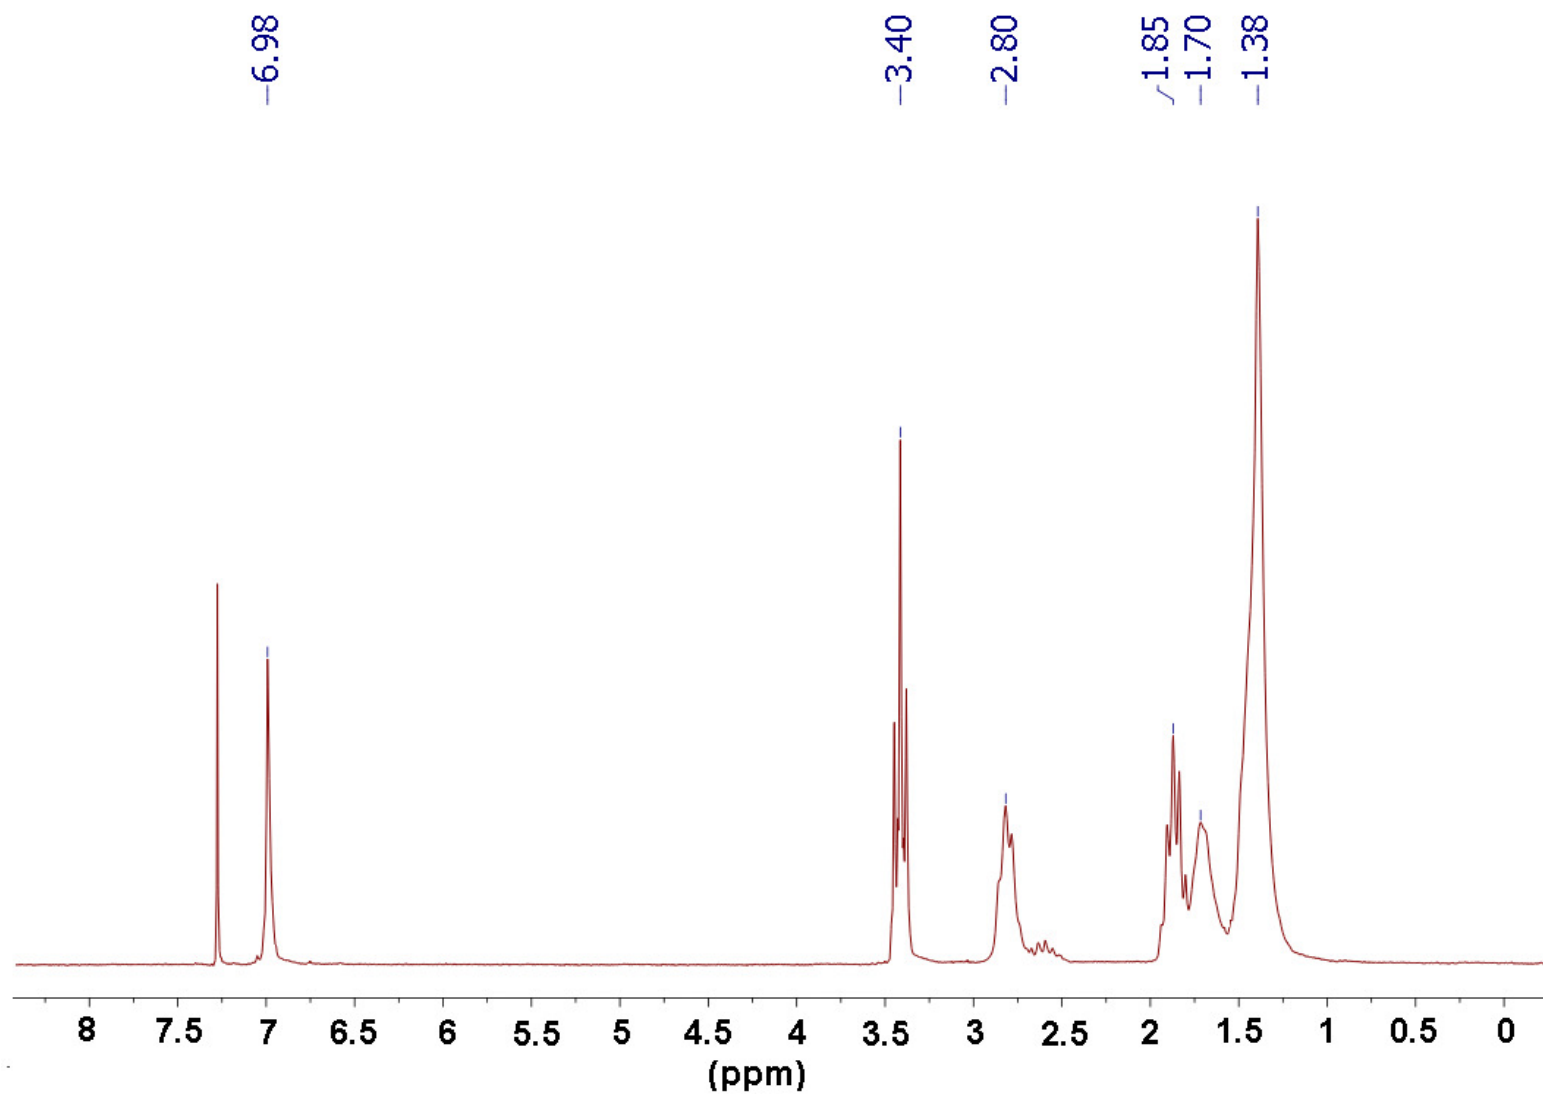

Figure S3 :  $^1\text{H}$  NMR spectrum of polymer **9** in  $\text{CDCl}_3$ .

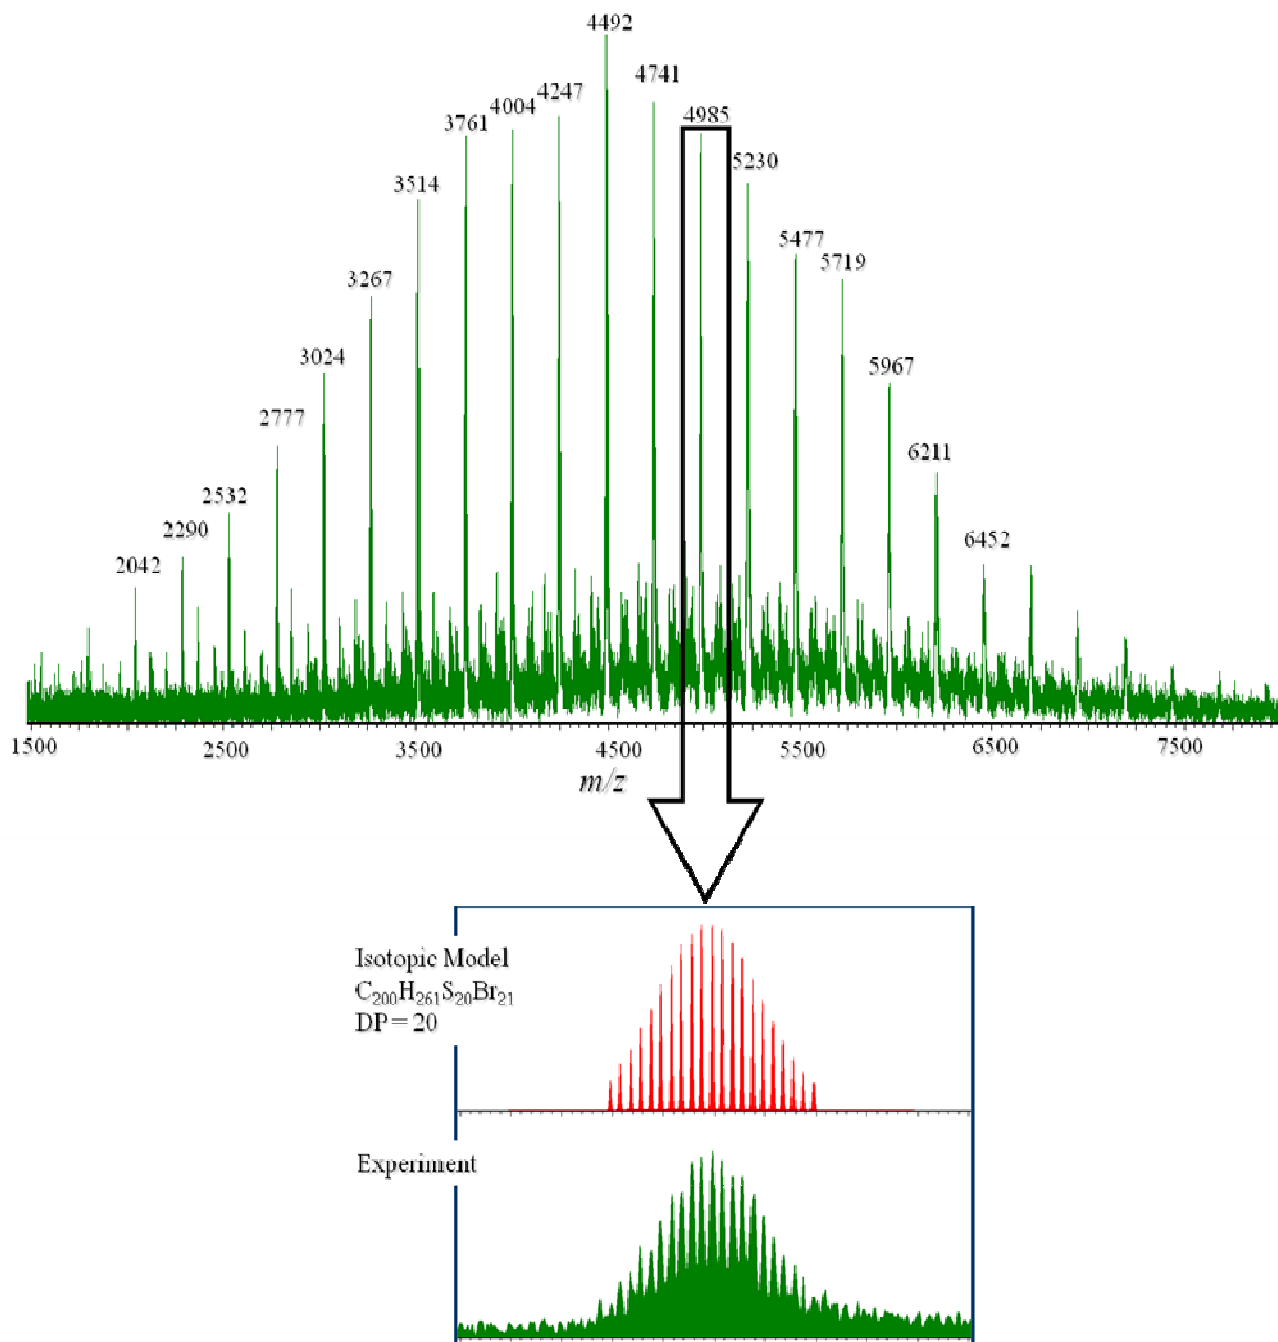

Figure S4 : MALDI-TOF spectrum for polymer **8**.

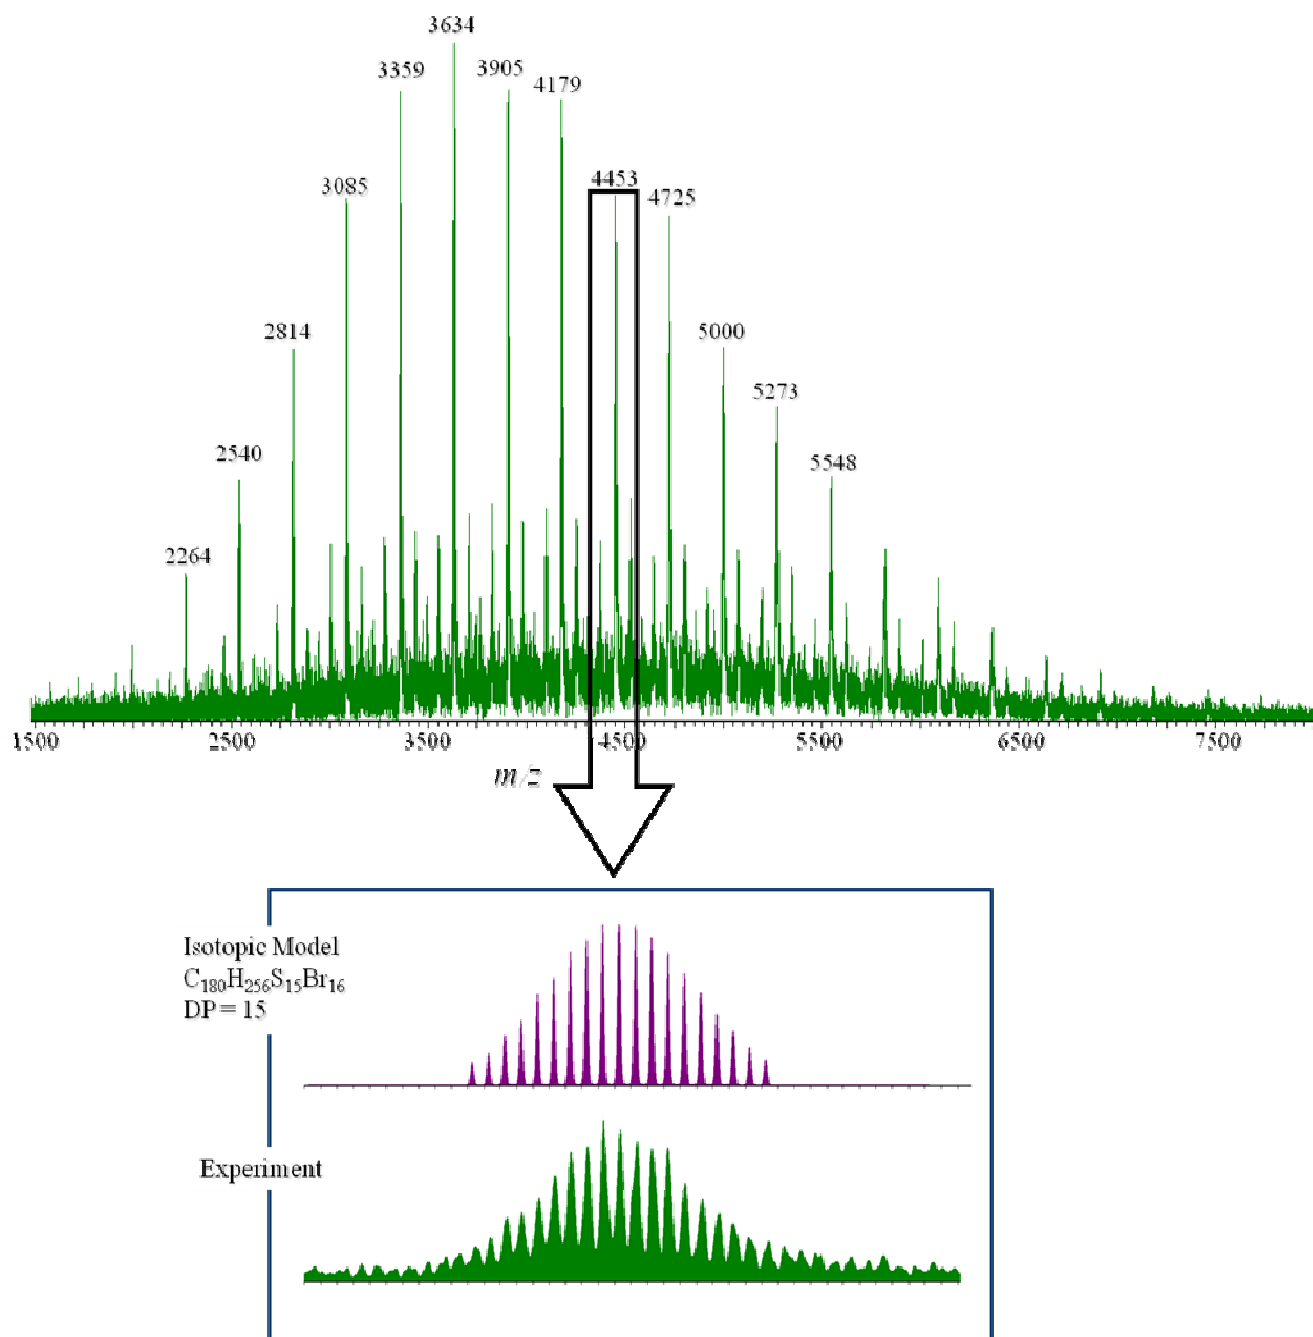

Figure S5 : MALDI-TOF spectrum for polymer **9**.

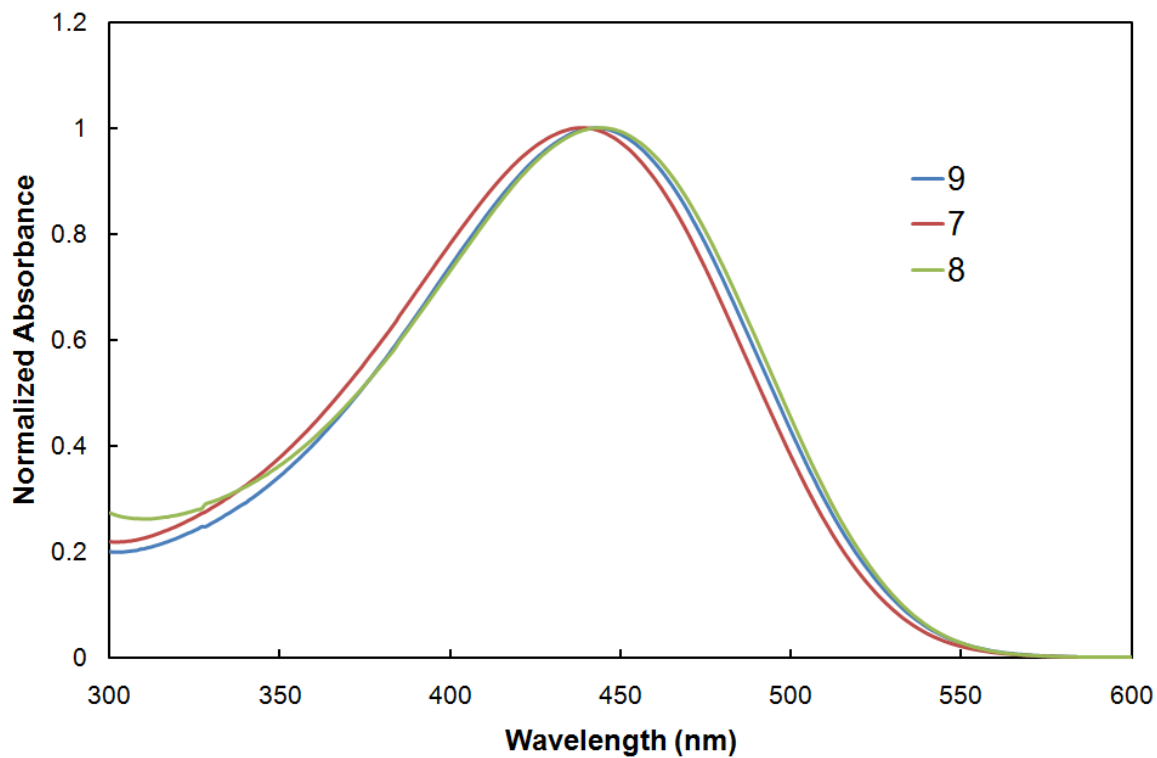

Figure S6 : UV-visible absorption spectra for polymers 7-9.

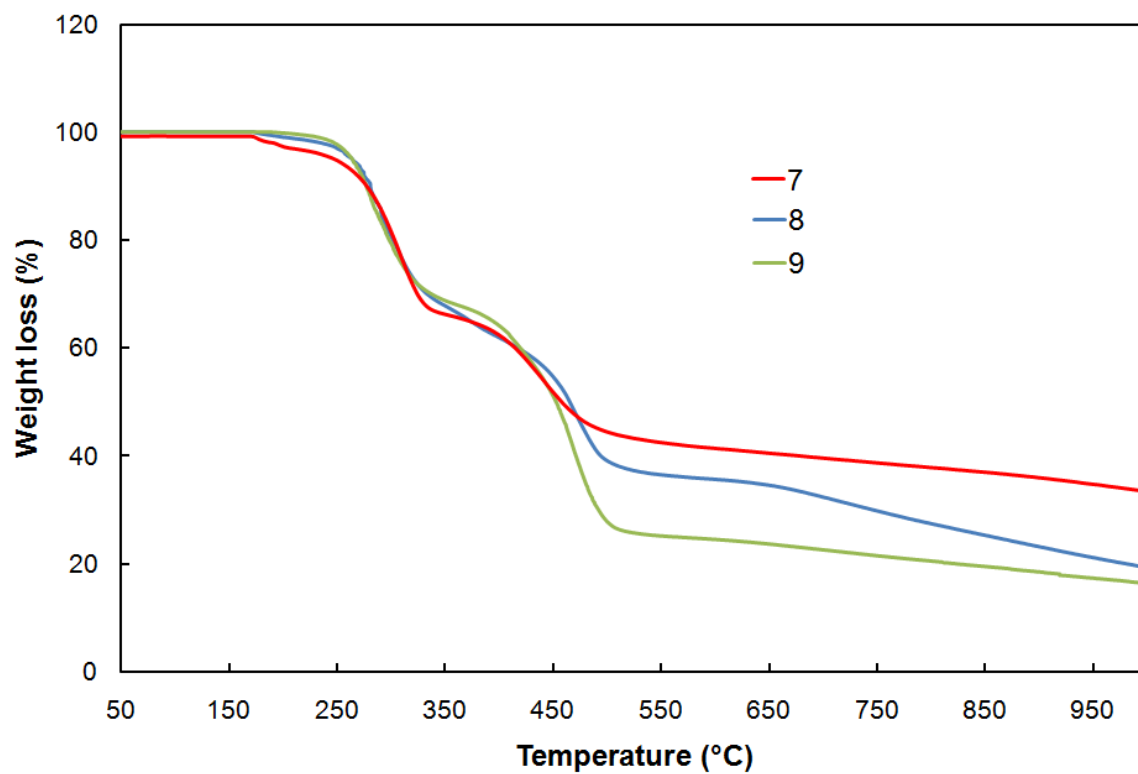

Figure S7 : TGA diagrams for polymers 7-9.

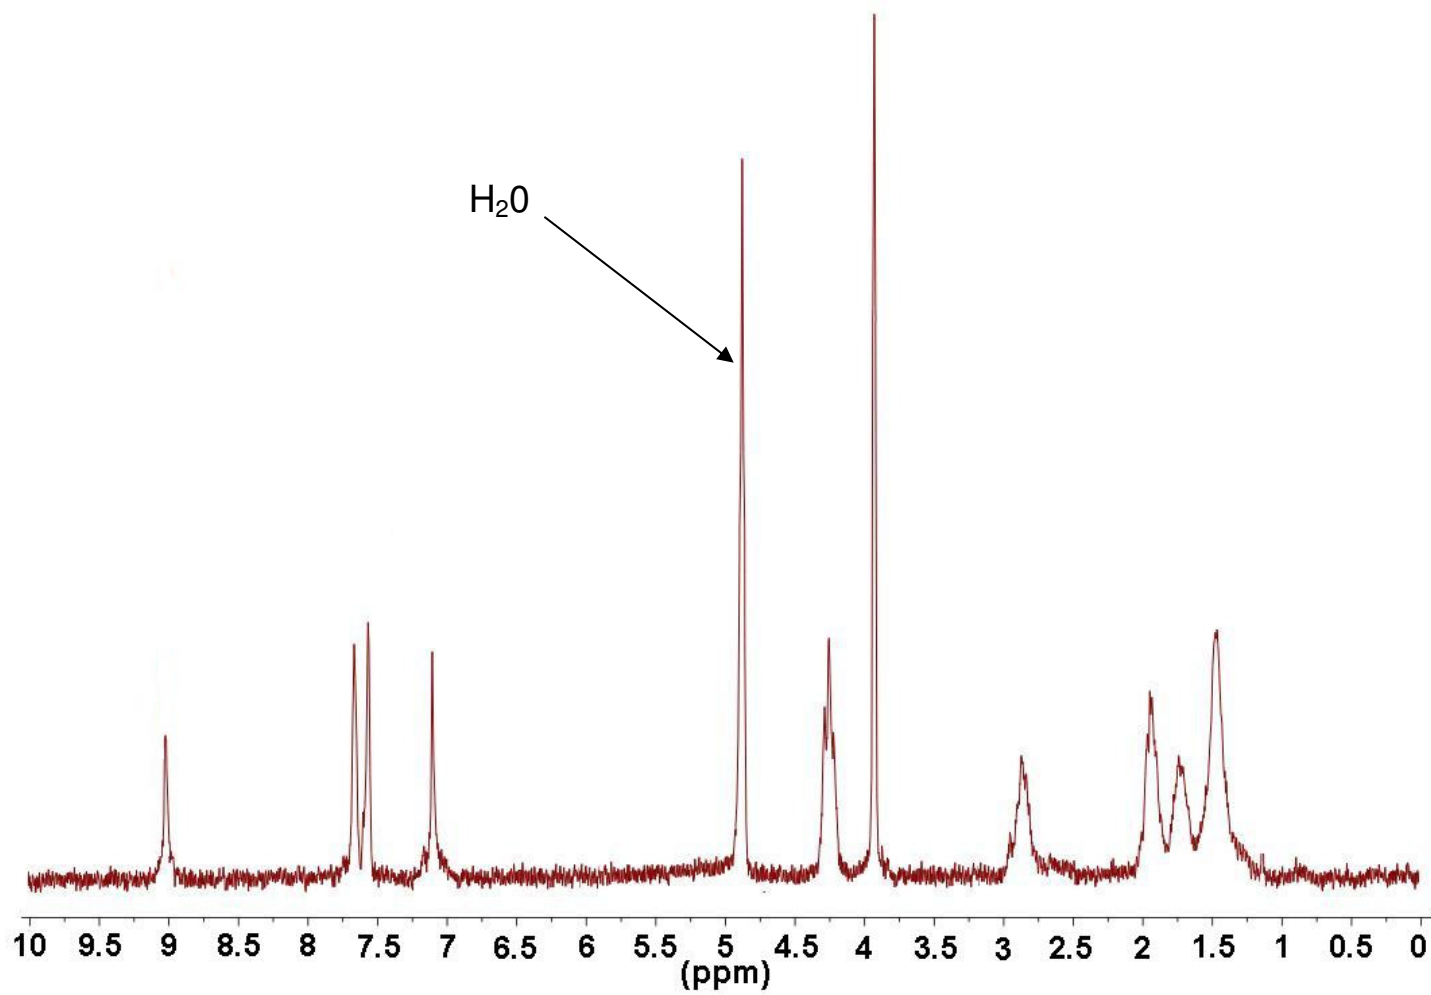

Figure S8 :  $^1\text{H}$  NMR spectrum of polymer **11** in  $\text{CD}_3\text{OD}$ .



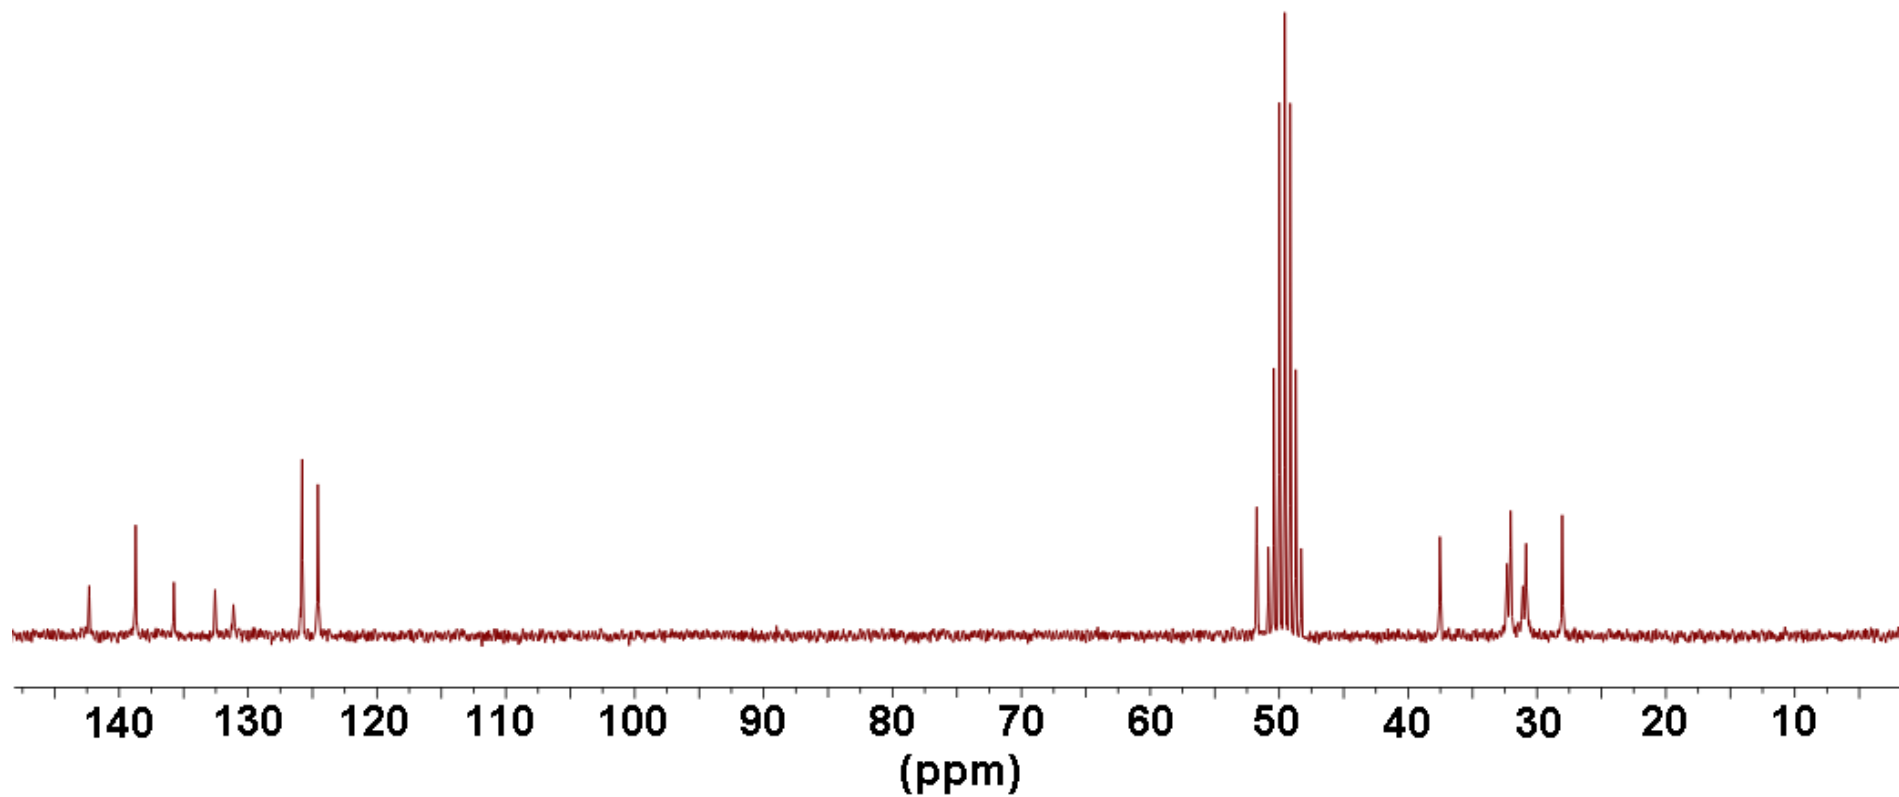

Figure S9 :  $^{13}\text{C}\{^1\text{H}\}$  NMR spectrum of polymer **11** in  $\text{CD}_3\text{OD}$ .

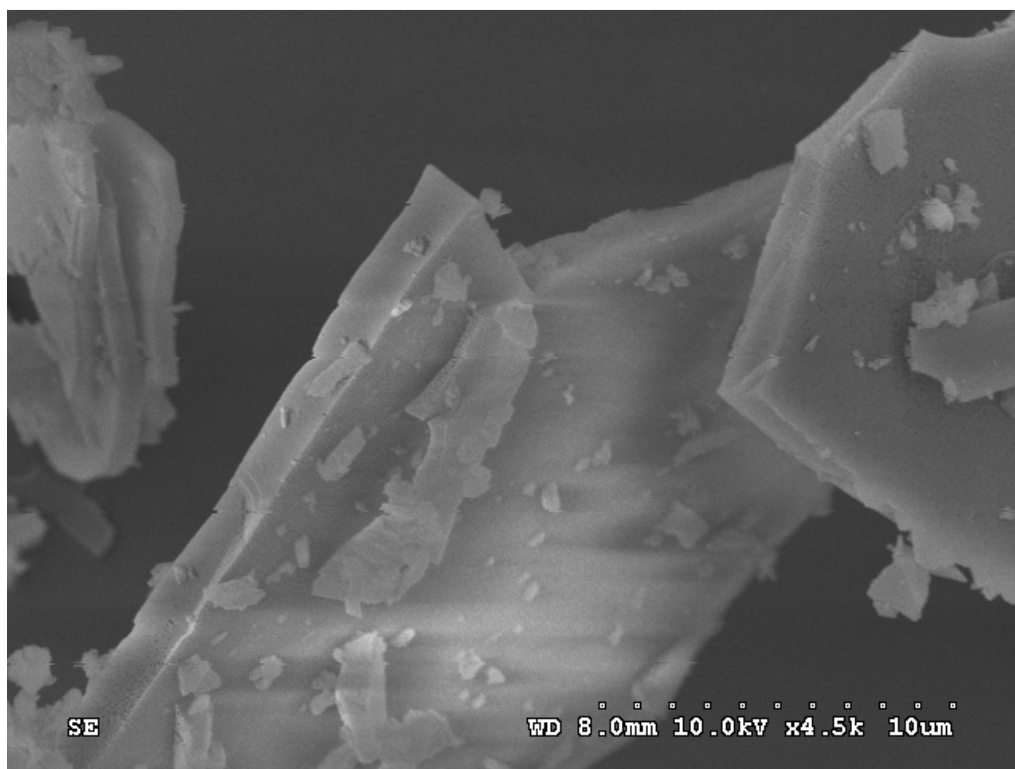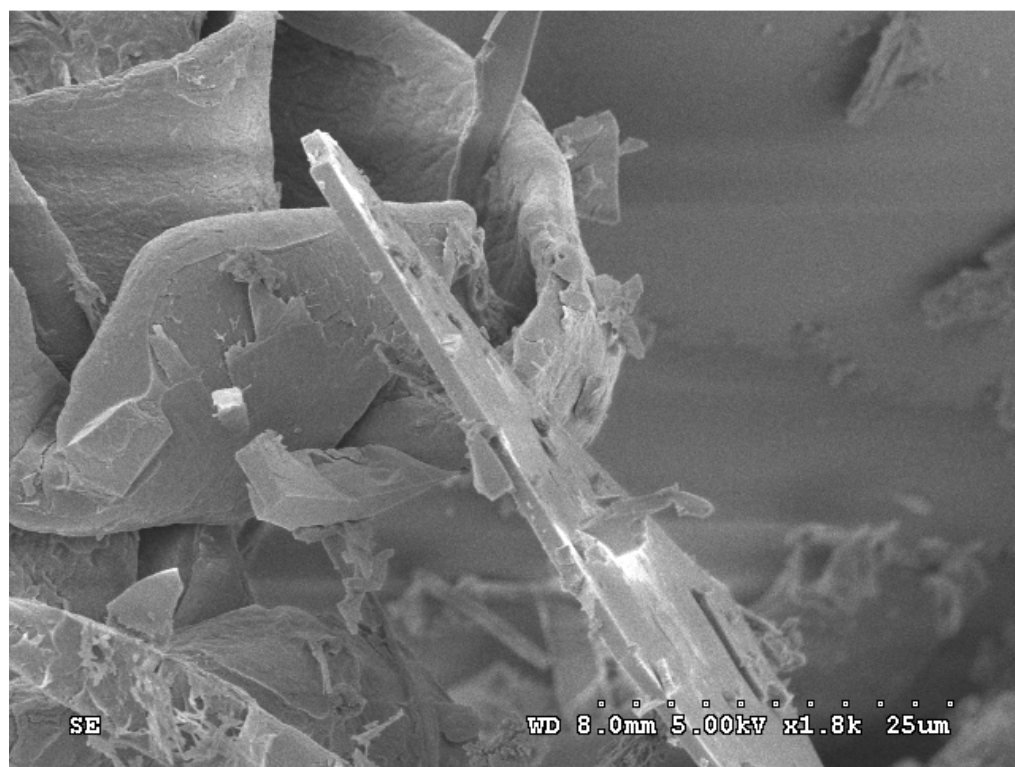

Figure S10: SEM images of **10/silica** (*up*) and **12/silica** (*down*) hybrid materials.

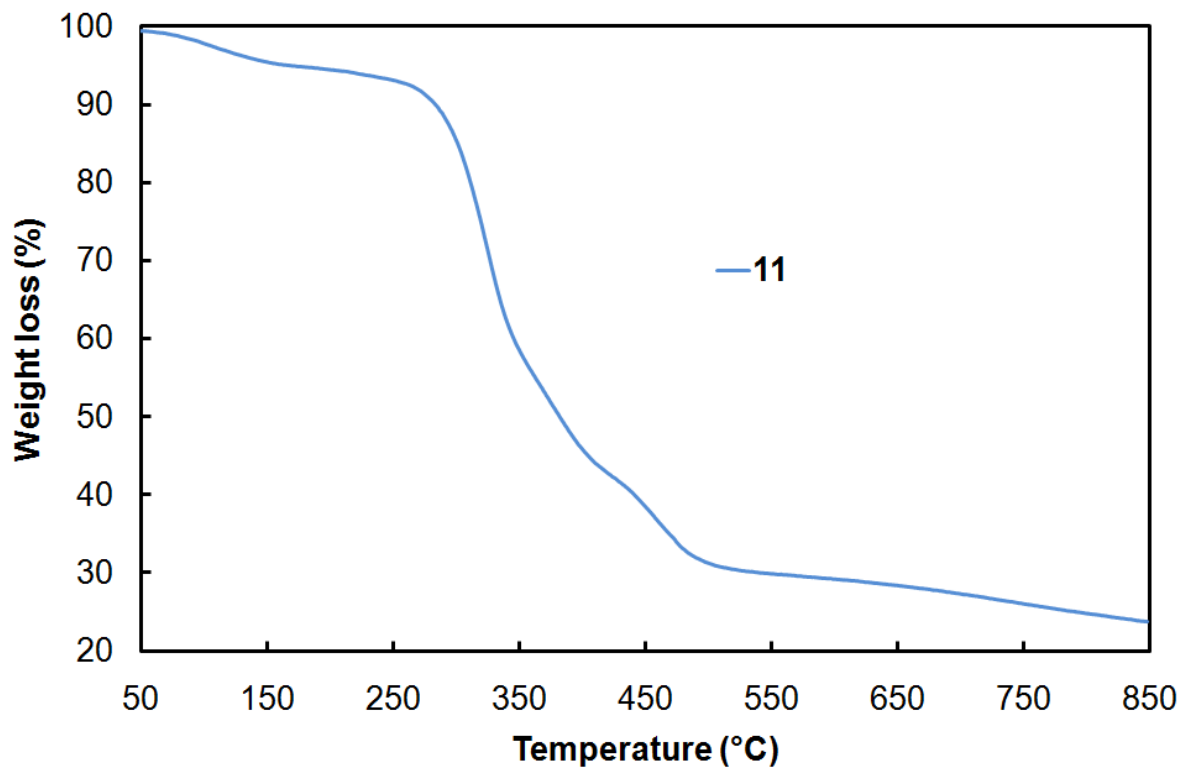

Figure S11: TGA curve of the cationic polymer **11**.

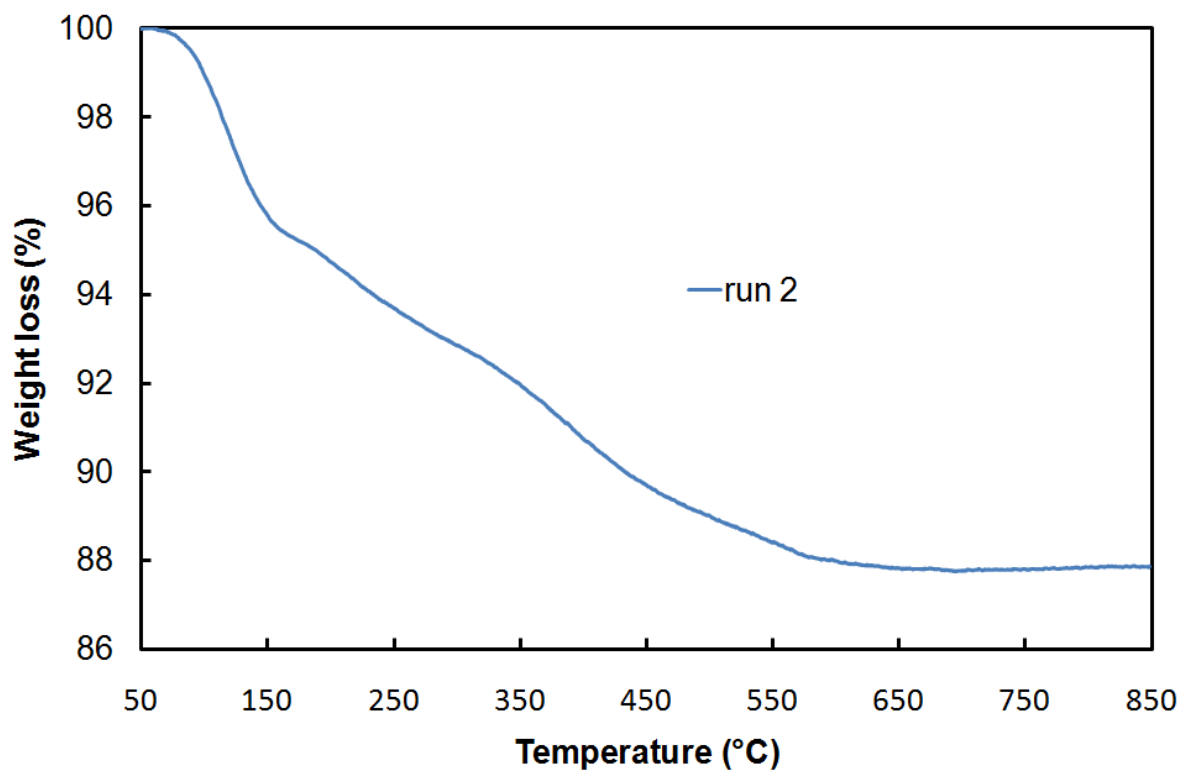

Figure S12: TGA curve of the polymer hybrid (**run 2**).
